# Supplementary material for: Multiomics analysis of tumor mutational burden across cancer types
Source: PubMed Central journal article supplement — Comput Struct Biotechnol J. 2021 Oct 12;19:5637–46. doi: 10.1016/j.csbj.2021.10.013 (PMC8531462; doi:10.1016/j.csbj.2021.10.013), 2021-10-12

**(A)**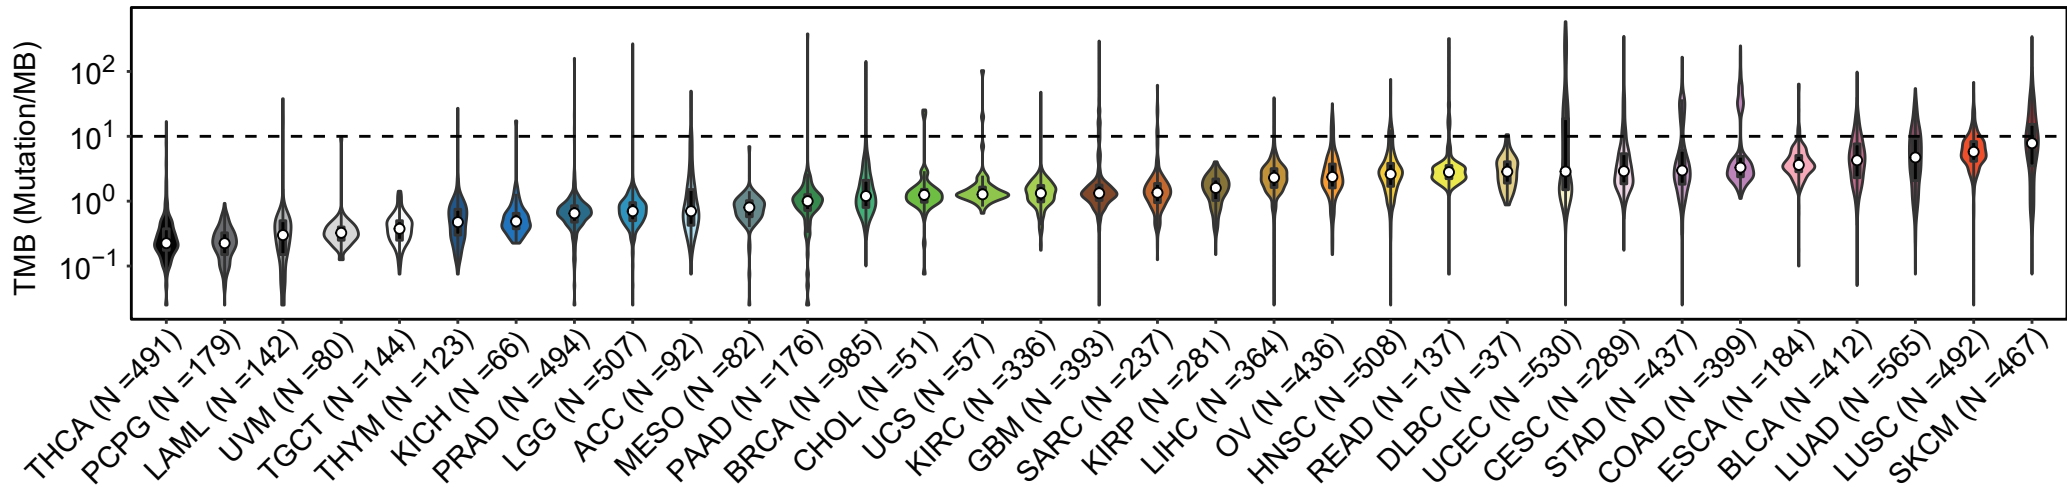

**(B)**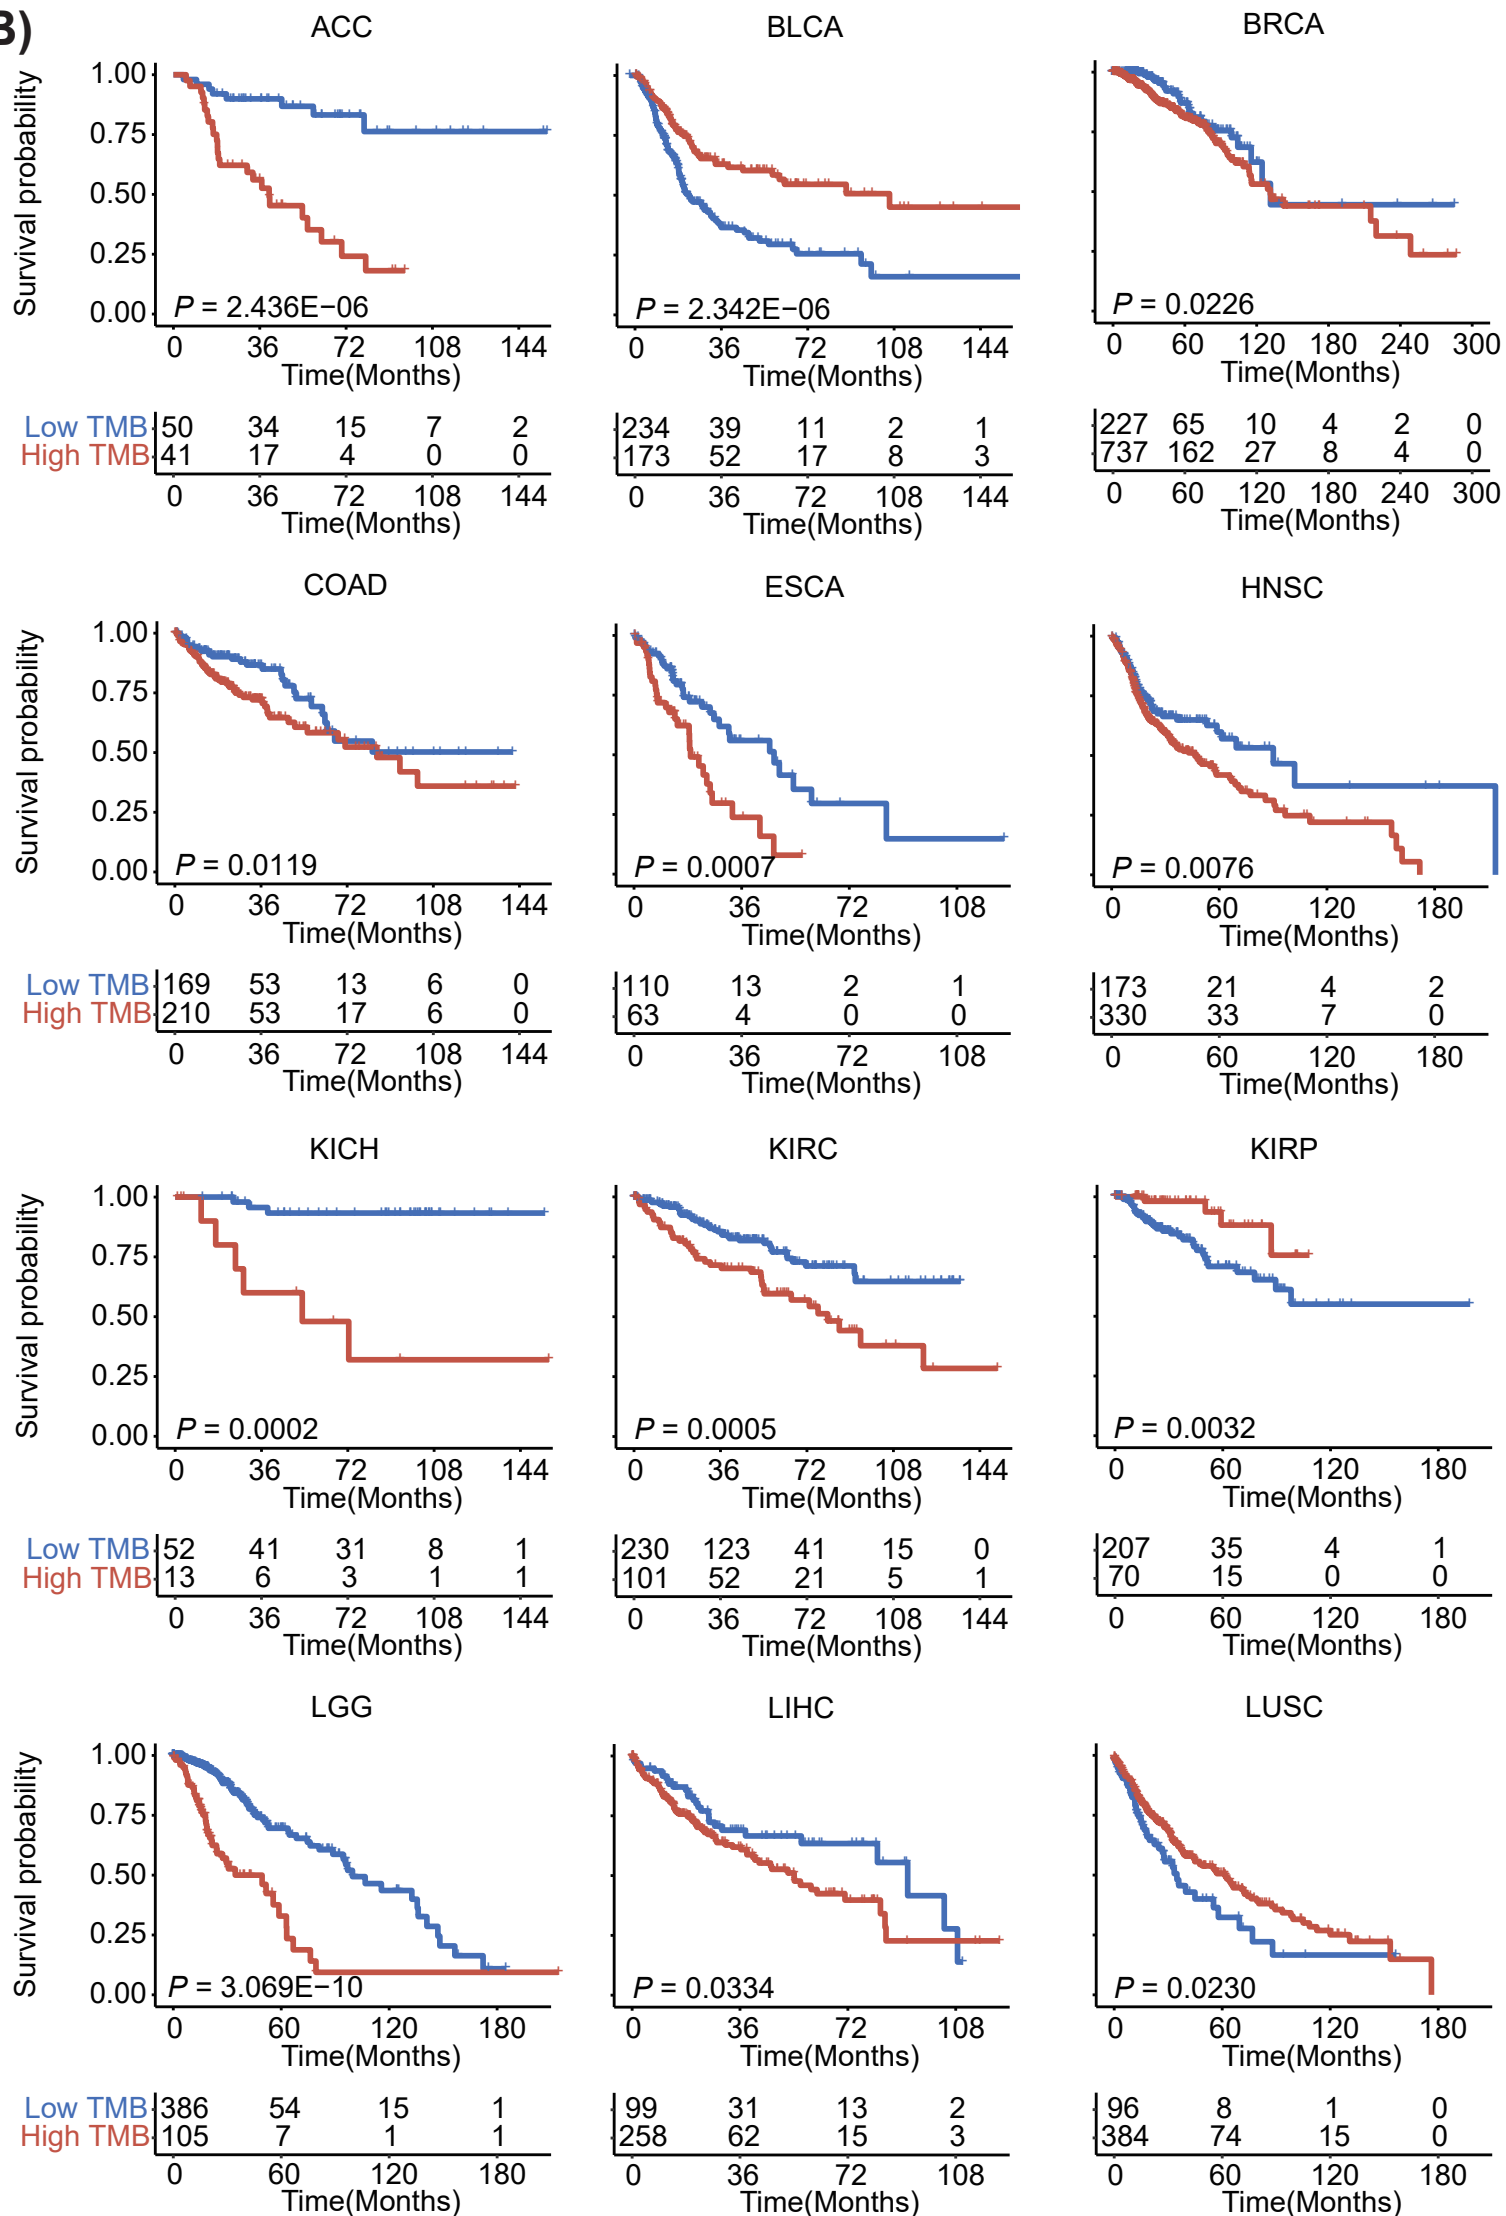

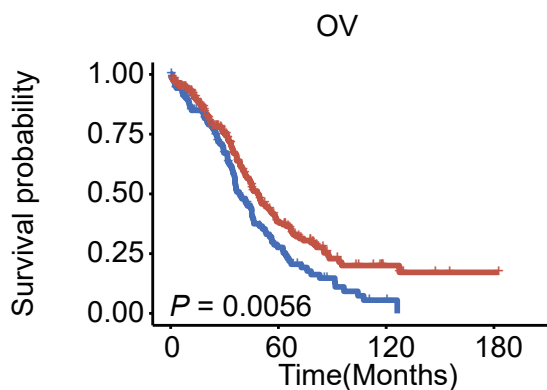

|          |     |    |     |     |
|----------|-----|----|-----|-----|
| Low TMB  | 144 | 24 | 2   | 0   |
| High TMB | 266 | 60 | 7   | 1   |
|          | 0   | 60 | 120 | 180 |

Time(Months)

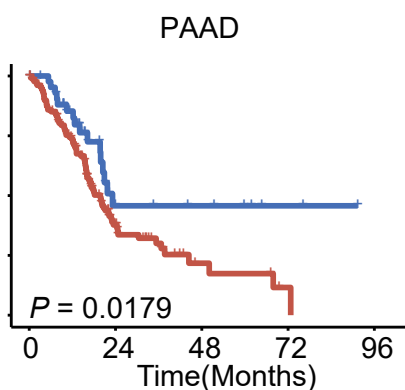

|          |     |    |    |    |    |
|----------|-----|----|----|----|----|
| Low TMB  | 44  | 9  | 6  | 2  | 0  |
| High TMB | 131 | 29 | 5  | 1  | 0  |
|          | 0   | 24 | 48 | 72 | 96 |

Time(Months)

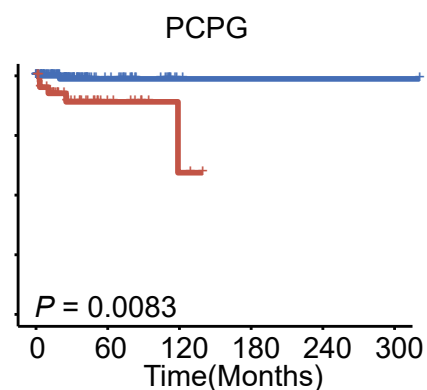

|          |     |    |     |     |     |     |
|----------|-----|----|-----|-----|-----|-----|
| Low TMB  | 131 | 23 | 2   | 1   | 1   | 1   |
| High TMB | 44  | 9  | 2   | 0   | 0   | 0   |
|          | 0   | 60 | 120 | 180 | 240 | 300 |

Time(Months)

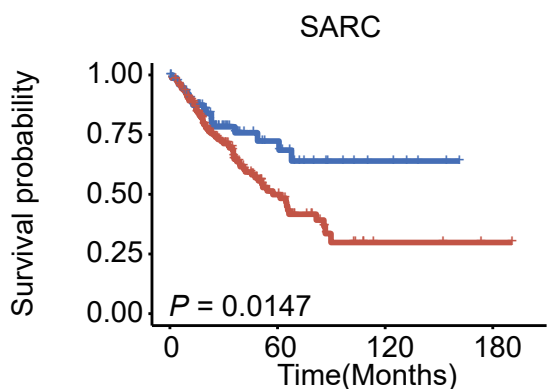

|          |     |    |     |     |
|----------|-----|----|-----|-----|
| Low TMB  | 76  | 19 | 5   | 0   |
| High TMB | 159 | 33 | 3   | 1   |
|          | 0   | 60 | 120 | 180 |

Time(Months)

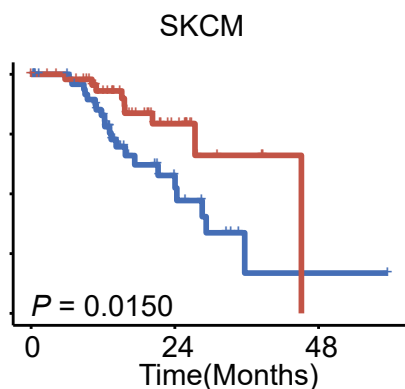

|          |    |    |    |
|----------|----|----|----|
| Low TMB  | 54 | 11 | 1  |
| High TMB | 49 | 13 | 0  |
|          | 0  | 24 | 48 |

Time(Months)

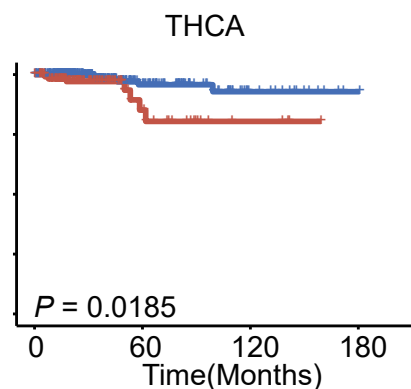

|          |     |    |     |     |
|----------|-----|----|-----|-----|
| Low TMB  | 366 | 76 | 14  | 1   |
| High TMB | 119 | 19 | 4   | 0   |
|          | 0   | 60 | 120 | 180 |

Time(Months)

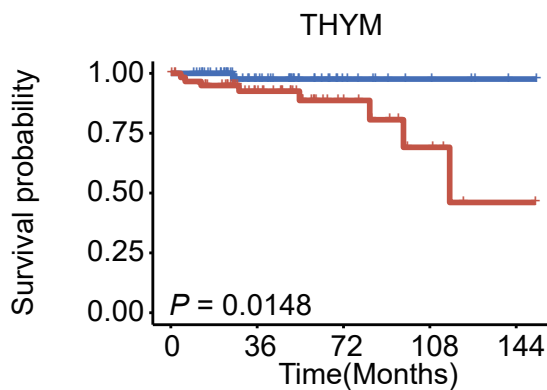

|          |    |    |    |     |     |
|----------|----|----|----|-----|-----|
| Low TMB  | 60 | 32 | 11 | 5   | 1   |
| High TMB | 62 | 35 | 13 | 5   | 1   |
|          | 0  | 36 | 72 | 108 | 144 |

Time(Months)

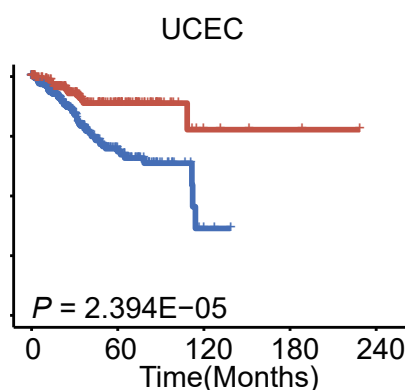

|          |     |    |     |     |     |
|----------|-----|----|-----|-----|-----|
| Low TMB  | 325 | 57 | 2   | 0   | 0   |
| High TMB | 198 | 55 | 4   | 2   | 0   |
|          | 0   | 60 | 120 | 180 | 240 |

Time(Months)

Group of TMB

— Low — High

**(C)**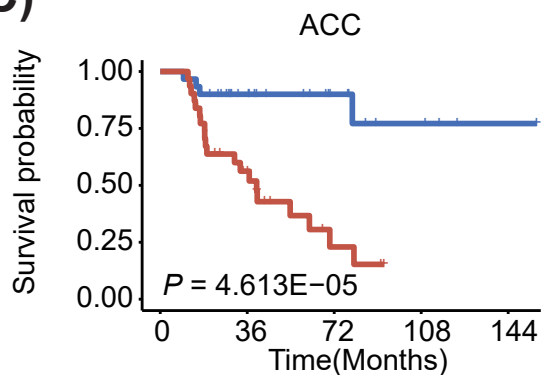

|          |    |    |    |     |     |
|----------|----|----|----|-----|-----|
| Low TMB  | 30 | 19 | 9  | 4   | 1   |
| High TMB | 31 | 14 | 3  | 0   | 0   |
|          | 0  | 36 | 72 | 108 | 144 |

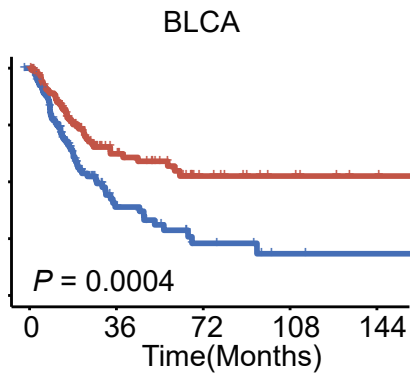

|          |     |    |    |     |     |
|----------|-----|----|----|-----|-----|
| Low TMB  | 135 | 22 | 7  | 2   | 1   |
| High TMB | 137 | 42 | 14 | 7   | 3   |
|          | 0   | 36 | 72 | 108 | 144 |

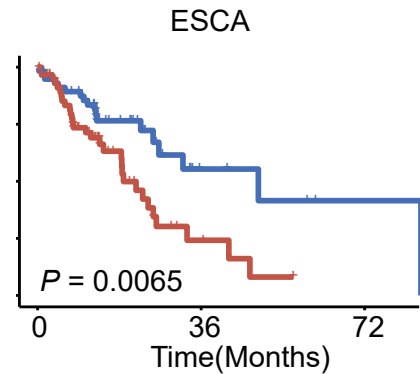

|          |    |    |    |
|----------|----|----|----|
| Low TMB  | 58 | 5  | 1  |
| High TMB | 59 | 4  | 0  |
|          | 0  | 36 | 72 |

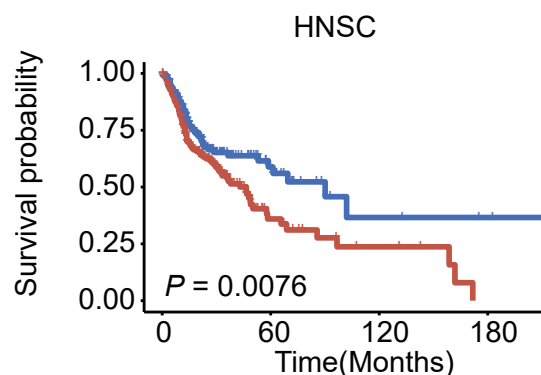

|          |     |    |     |     |
|----------|-----|----|-----|-----|
| Low TMB  | 168 | 21 | 4   | 2   |
| High TMB | 169 | 16 | 5   | 0   |
|          | 0   | 60 | 120 | 180 |

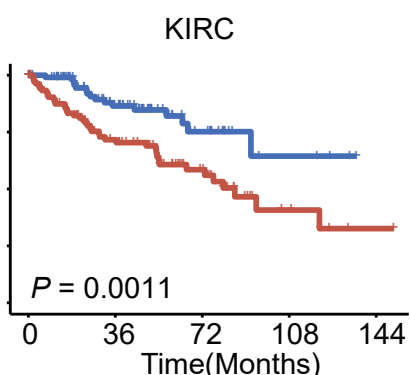

|          |     |    |    |     |     |
|----------|-----|----|----|-----|-----|
| Low TMB  | 110 | 58 | 18 | 4   | 0   |
| High TMB | 111 | 56 | 25 | 6   | 1   |
|          | 0   | 36 | 72 | 108 | 144 |

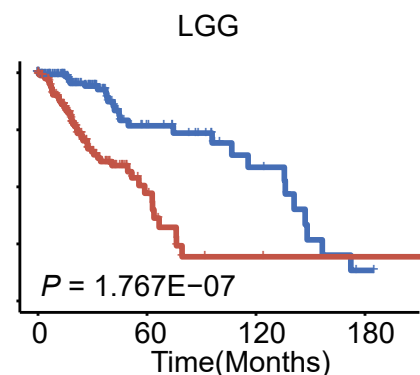

|          |     |    |     |     |
|----------|-----|----|-----|-----|
| Low TMB  | 162 | 28 | 11  | 1   |
| High TMB | 165 | 14 | 2   | 1   |
|          | 0   | 60 | 120 | 180 |

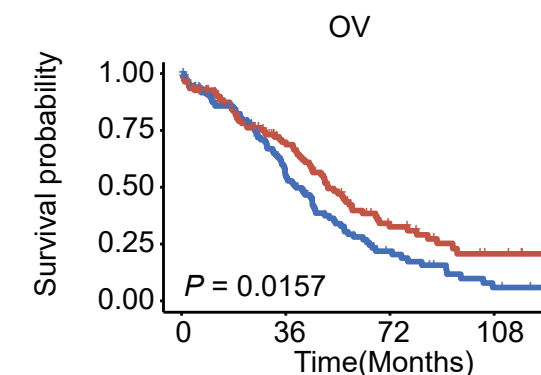

|          |     |    |    |     |
|----------|-----|----|----|-----|
| Low TMB  | 137 | 54 | 15 | 3   |
| High TMB | 138 | 63 | 21 | 7   |
|          | 0   | 36 | 72 | 108 |

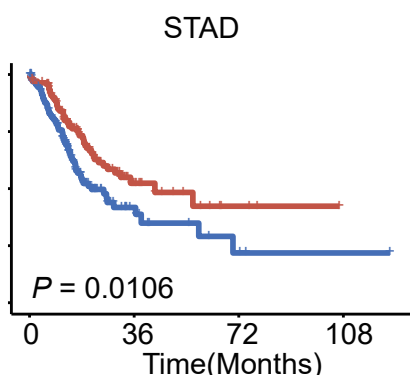

|          |     |    |    |     |
|----------|-----|----|----|-----|
| Low TMB  | 137 | 14 | 3  | 1   |
| High TMB | 138 | 18 | 3  | 0   |
|          | 0   | 36 | 72 | 108 |

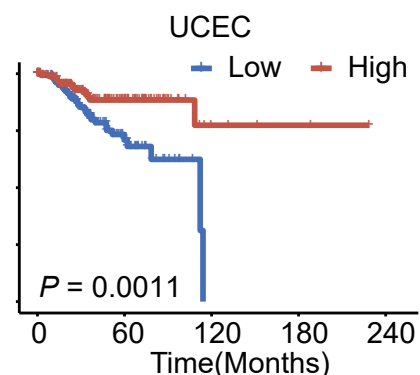

|          |     |    |     |     |     |
|----------|-----|----|-----|-----|-----|
| Low TMB  | 175 | 29 | 0   | 0   | 0   |
| High TMB | 176 | 48 | 4   | 2   | 0   |
|          | 0   | 60 | 120 | 180 | 240 |

**(D)**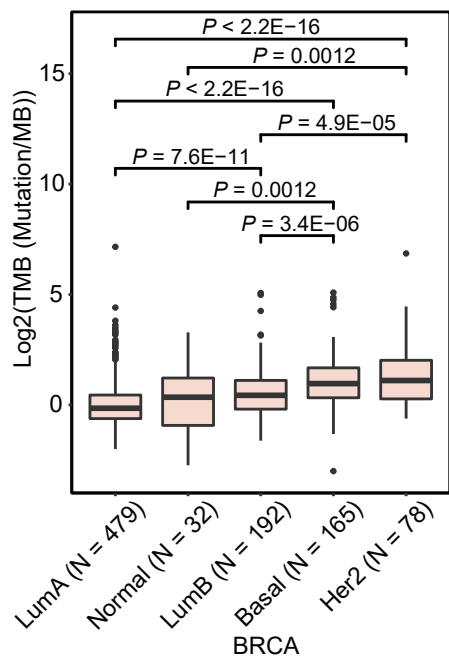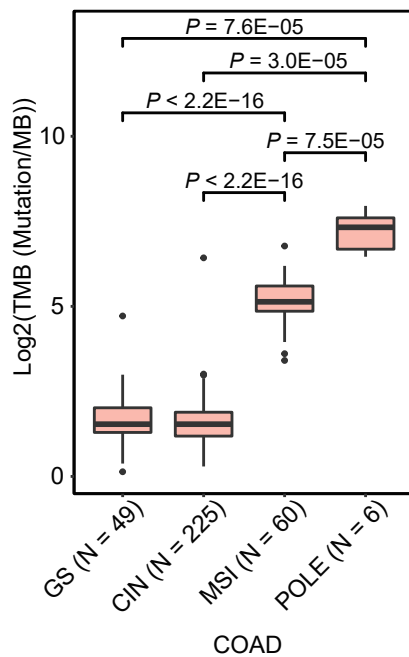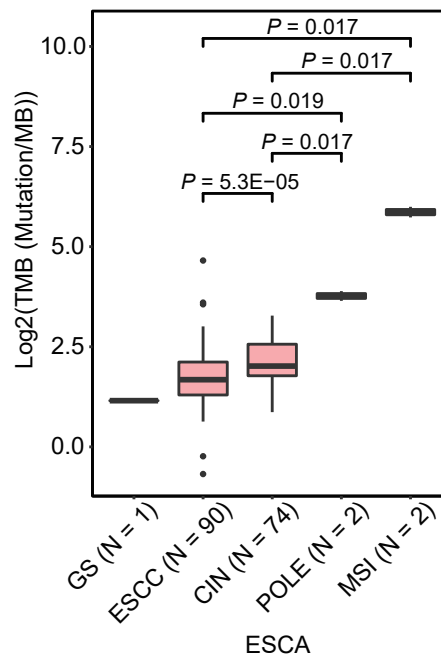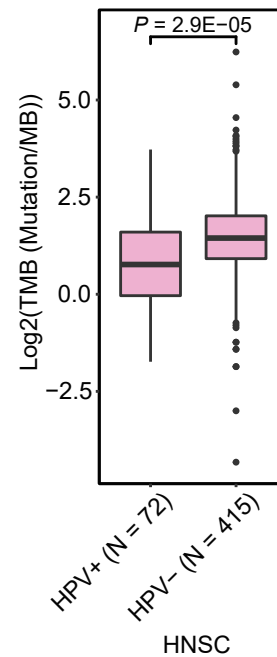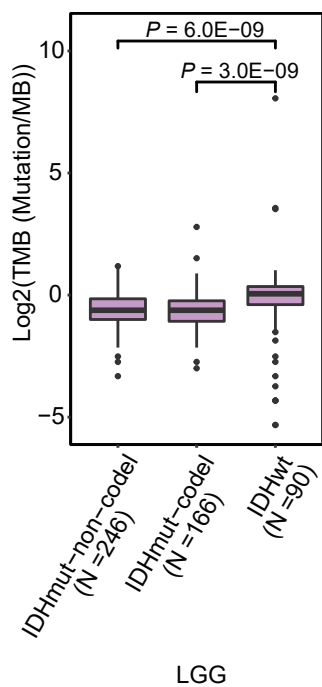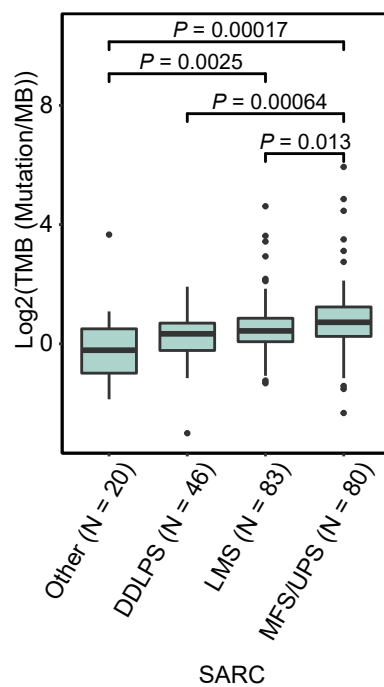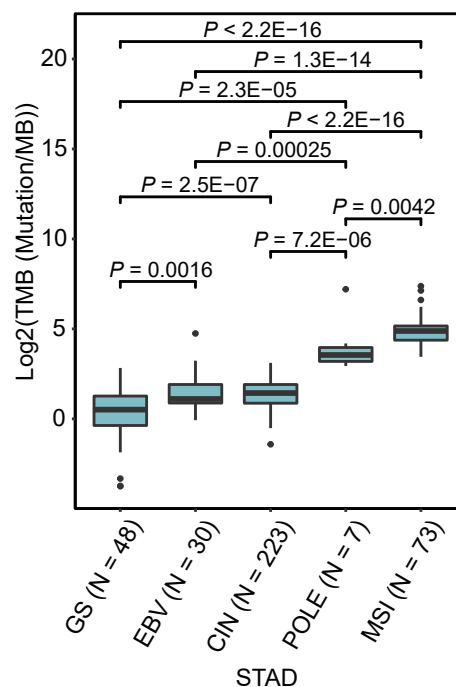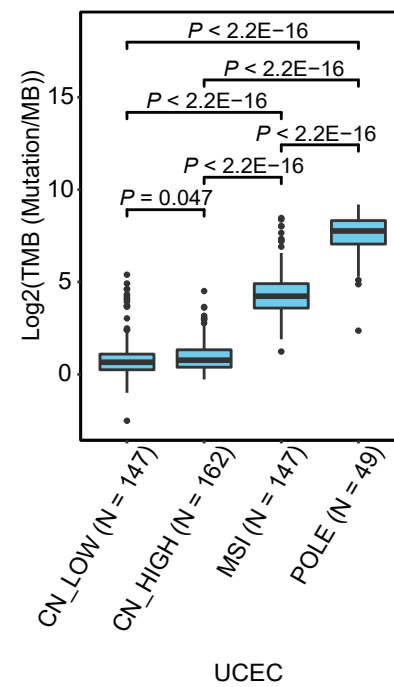

**(E)**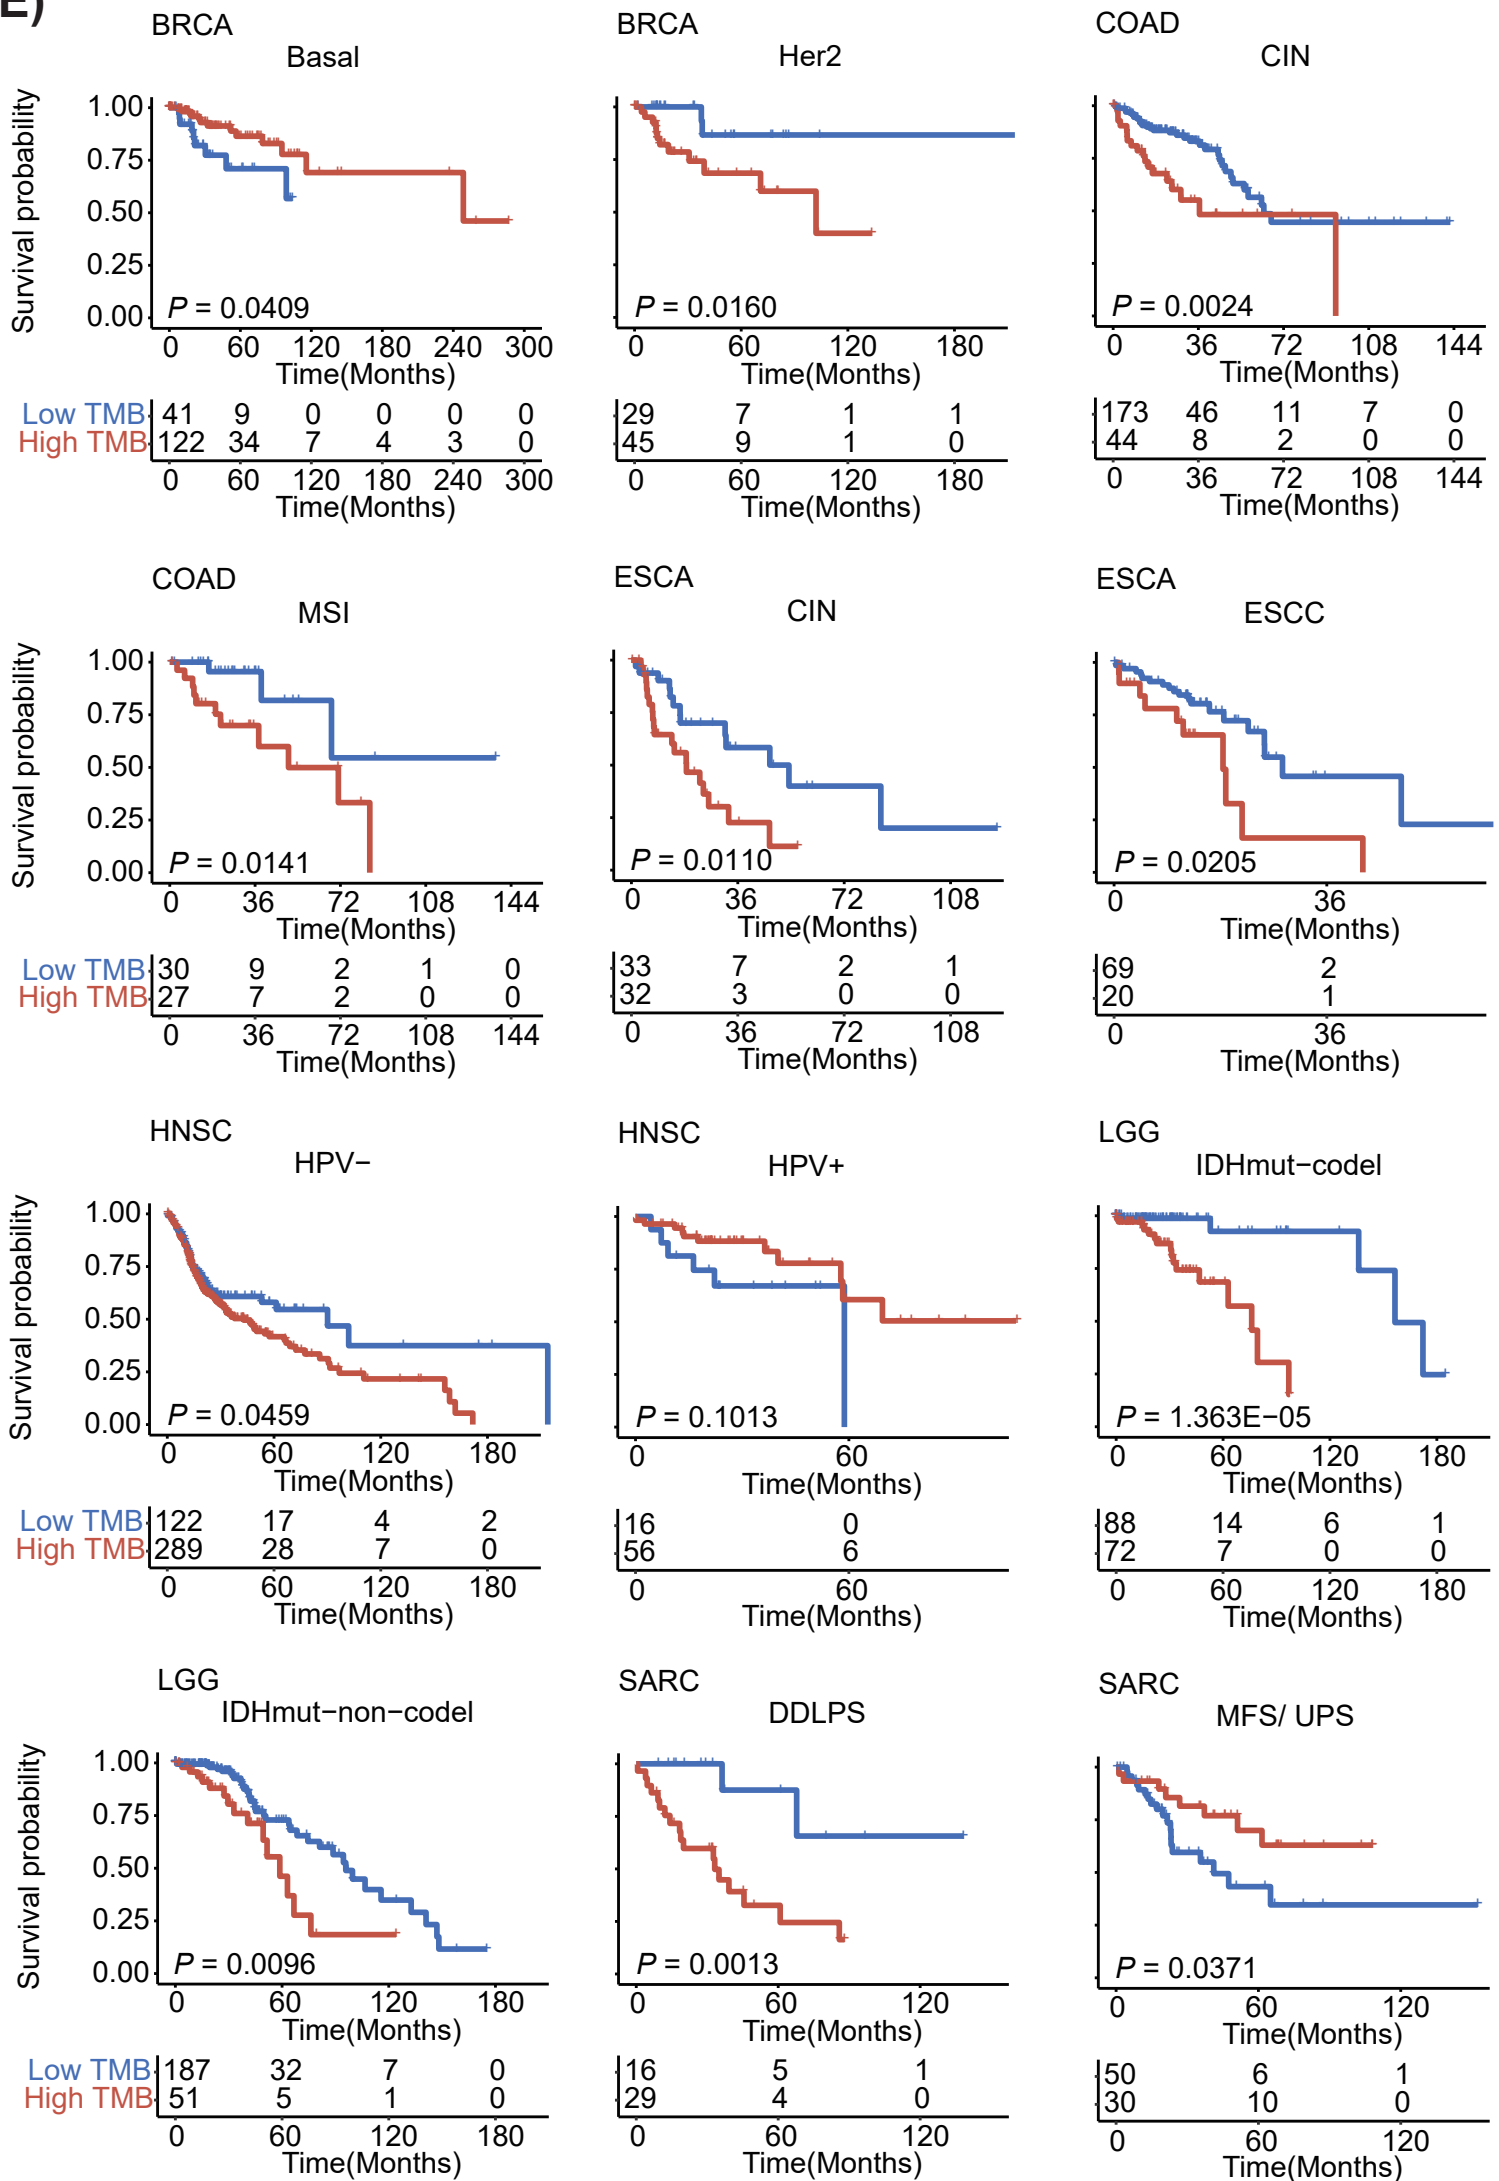

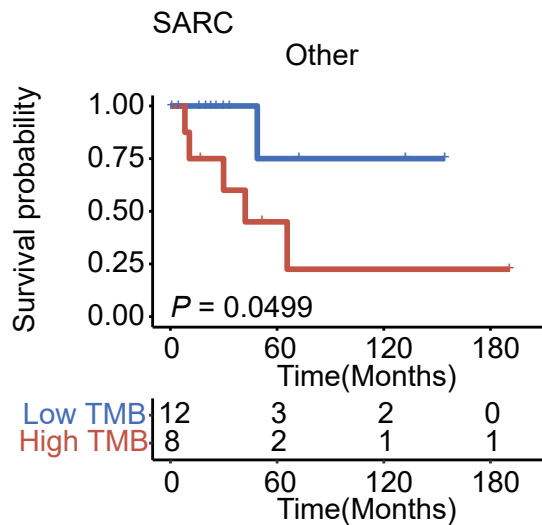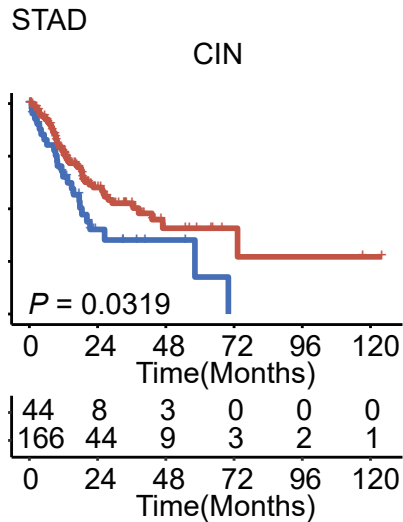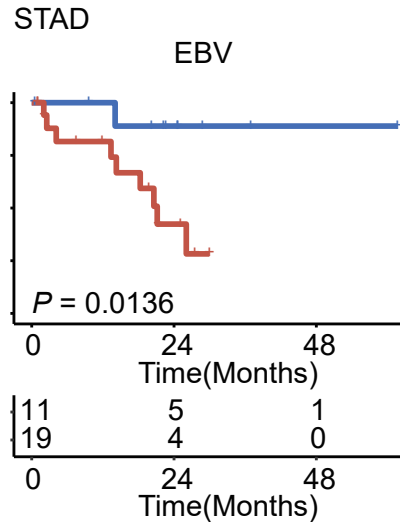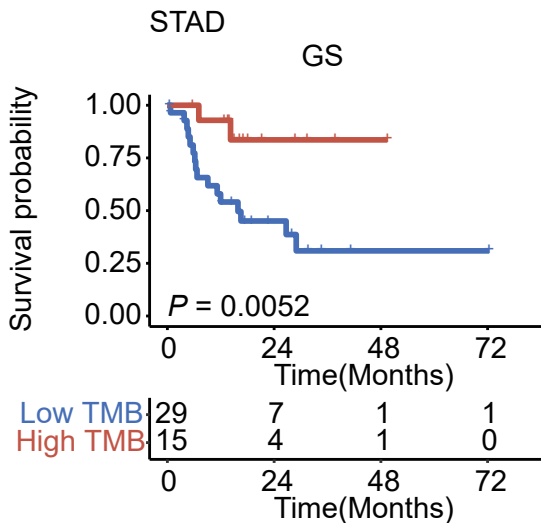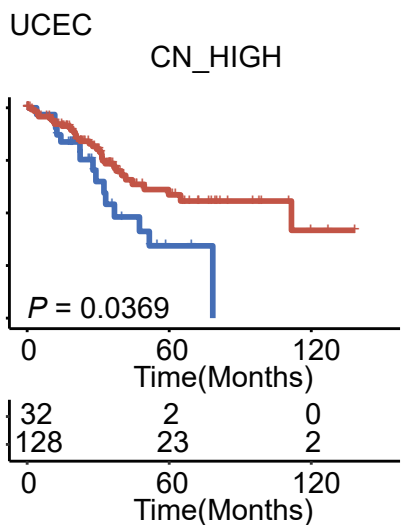

Group of TMB

— Low — High

**(F)**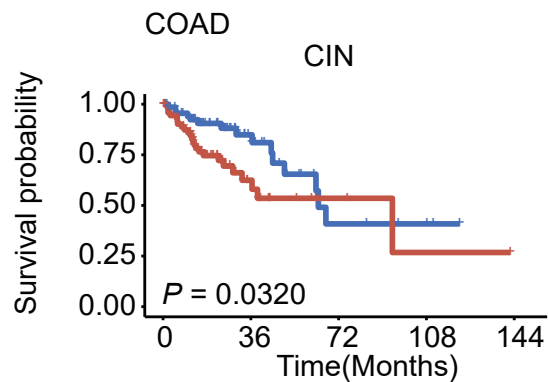

|          |    |    |    |     |     |
|----------|----|----|----|-----|-----|
| Low TMB  | 72 | 22 | 5  | 3   | 0   |
| High TMB | 73 | 14 | 3  | 1   | 0   |
|          | 0  | 36 | 72 | 108 | 144 |

Time (Months)

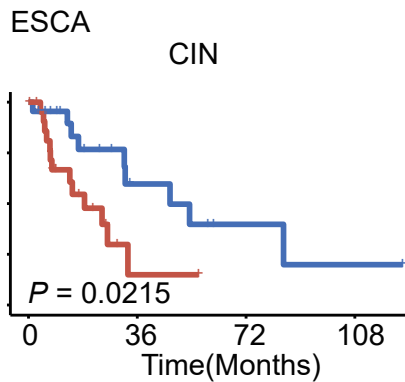

|  |    |    |    |     |
|--|----|----|----|-----|
|  | 22 | 6  | 2  | 1   |
|  | 23 | 1  | 0  | 0   |
|  | 0  | 36 | 72 | 108 |

Time (Months)

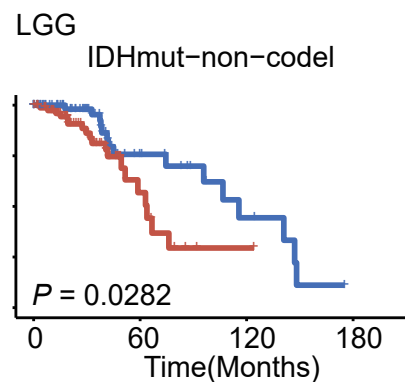

|  |    |    |     |     |
|--|----|----|-----|-----|
|  | 79 | 15 | 5   | 0   |
|  | 80 | 9  | 1   | 0   |
|  | 0  | 60 | 120 | 180 |

Time (Months)

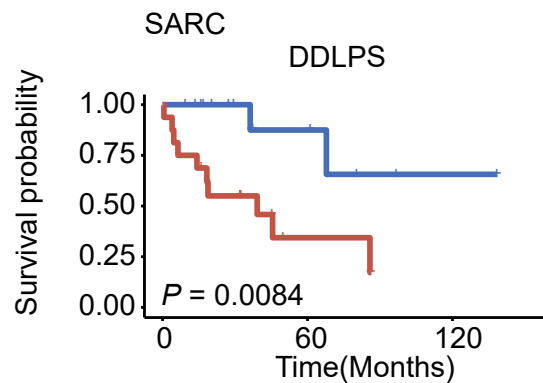

|          |    |    |     |
|----------|----|----|-----|
| Low TMB  | 15 | 5  | 1   |
| High TMB | 16 | 2  | 0   |
|          | 0  | 60 | 120 |

Time (Months)

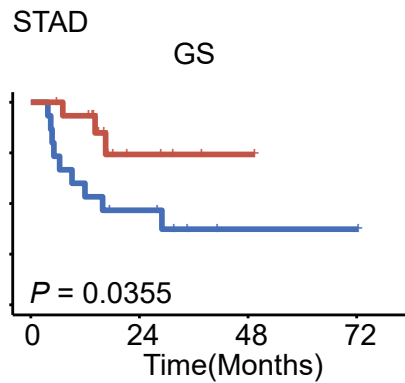

|  |    |    |    |    |
|--|----|----|----|----|
|  | 15 | 6  | 1  | 1  |
|  | 16 | 4  | 1  | 0  |
|  | 0  | 24 | 48 | 72 |

Time (Months)

Group of TMB

— Low — High



**(G)**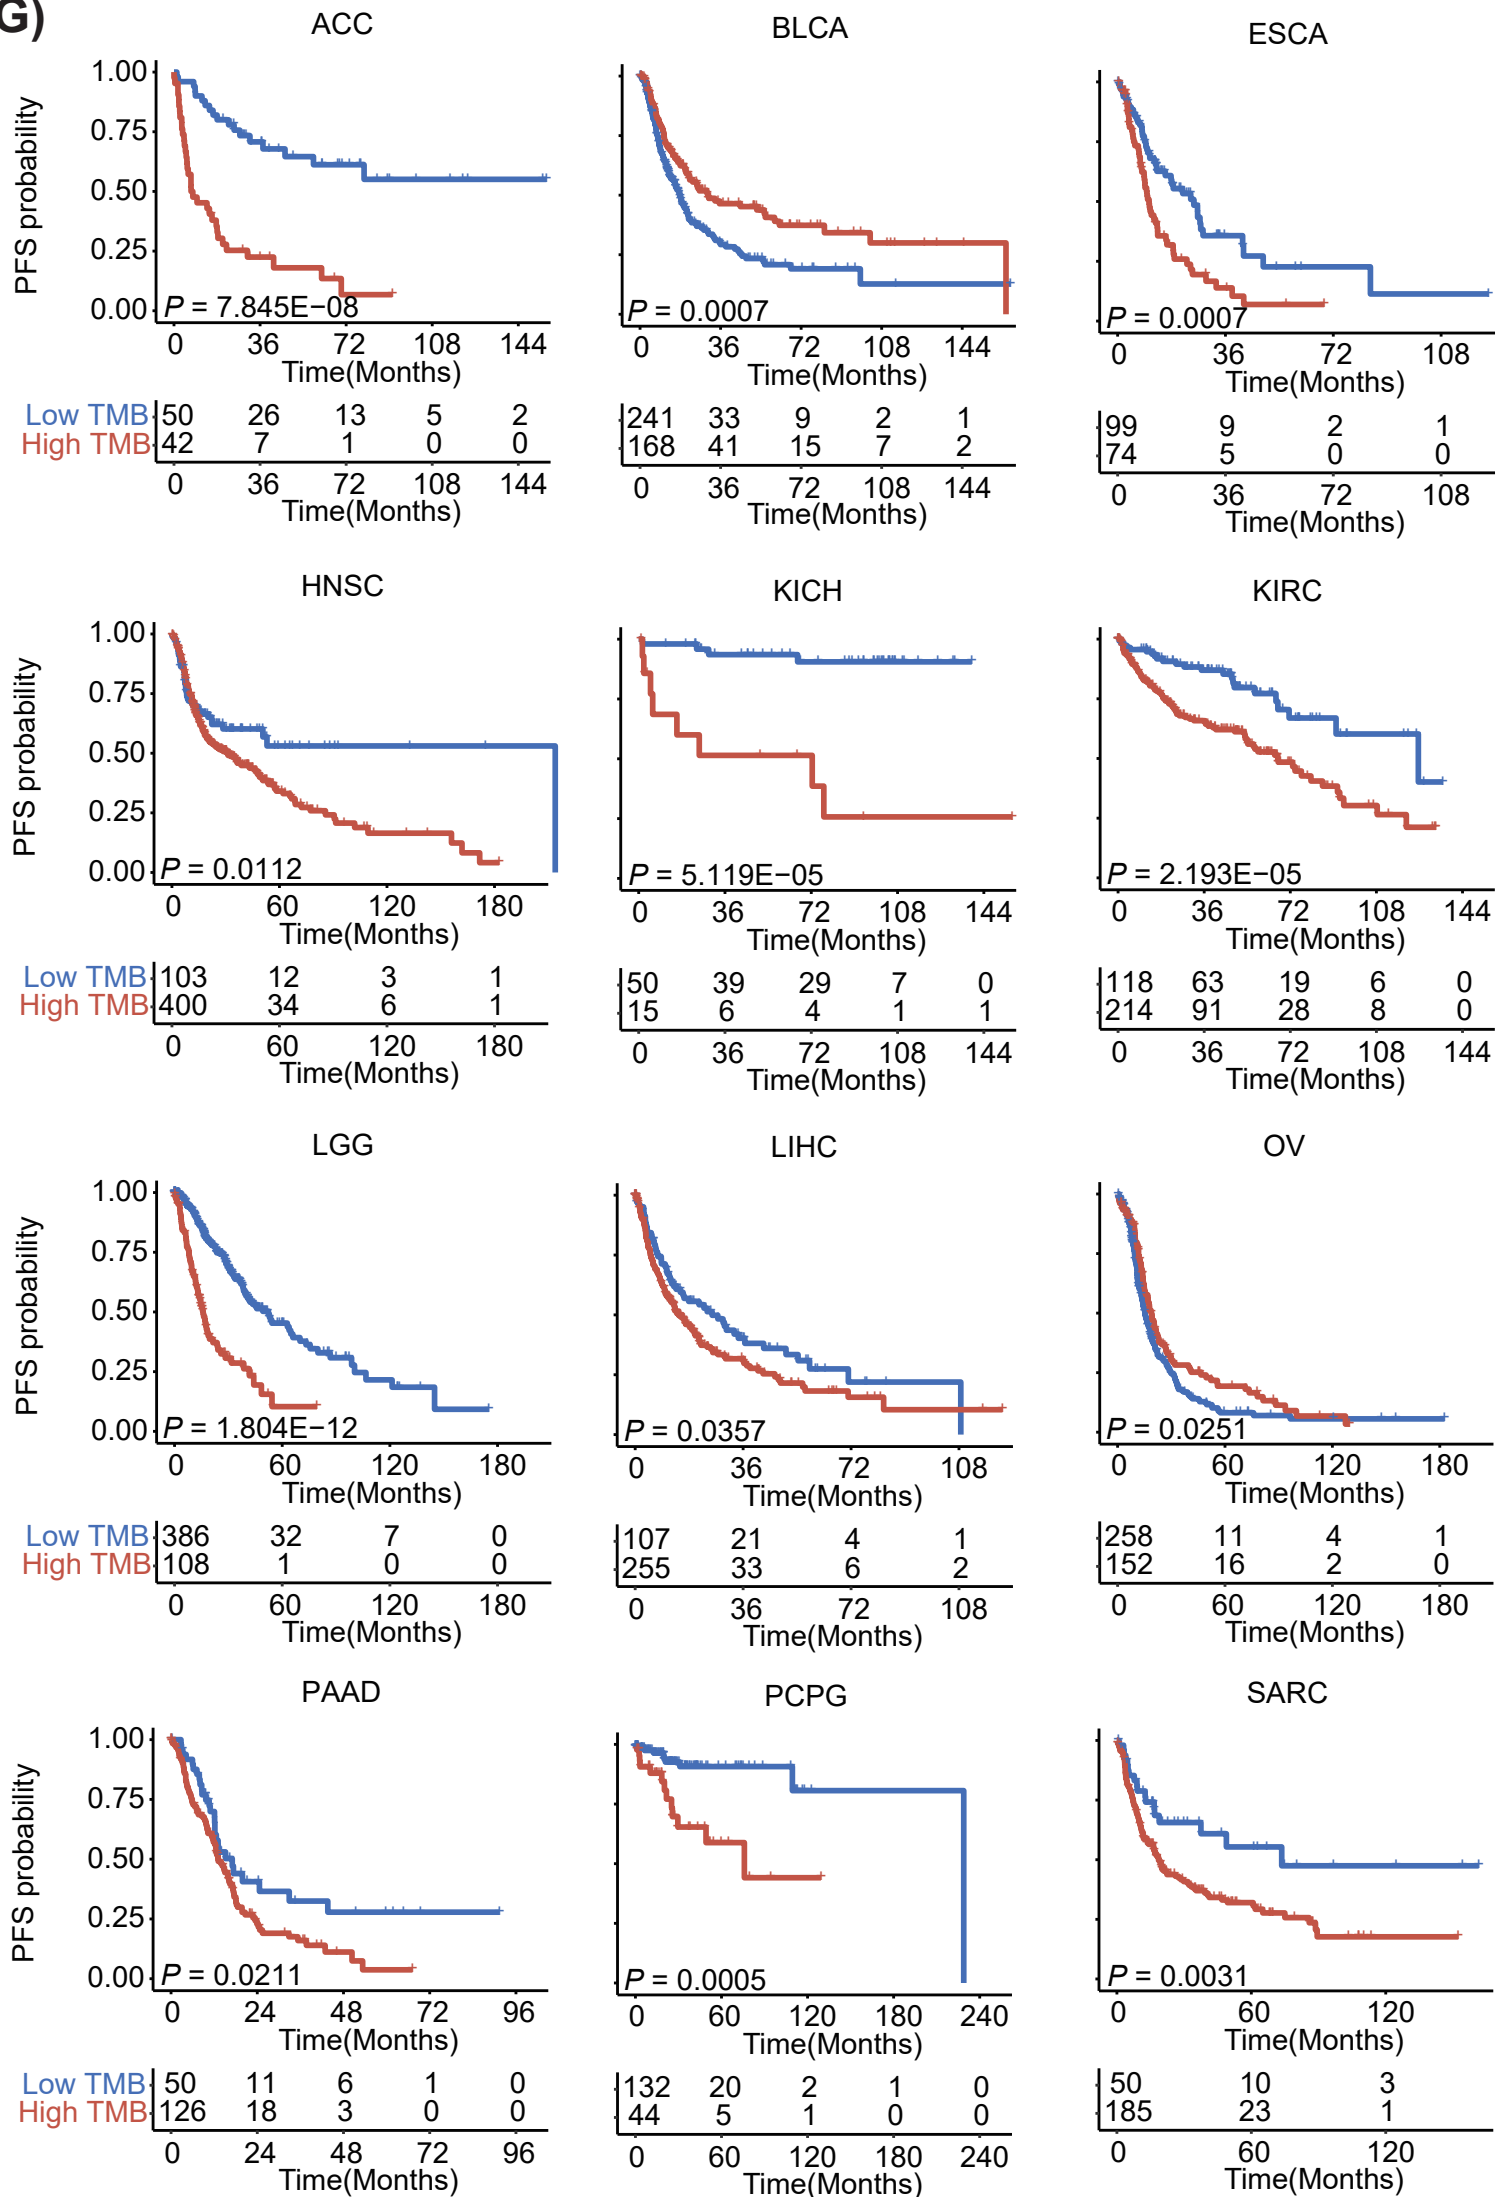

### SKCM

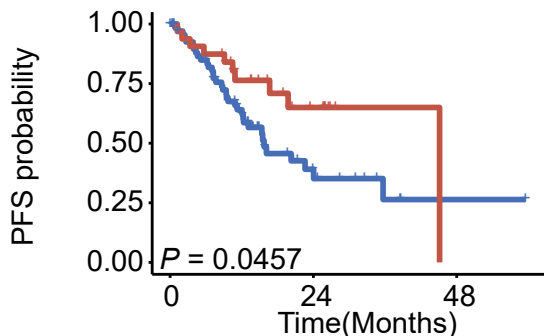

|          |              |    |    |
|----------|--------------|----|----|
| Low TMB  | 72           | 10 | 1  |
| High TMB | 32           | 8  | 0  |
|          | 0            | 24 | 48 |
|          | Time(Months) |    |    |

### THCA

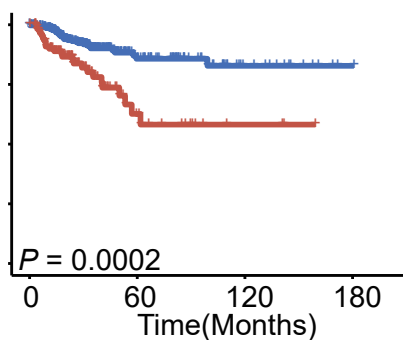

|          |              |    |     |     |
|----------|--------------|----|-----|-----|
| Low TMB  | 369          | 66 | 13  | 1   |
| High TMB | 117          | 15 | 3   | 0   |
|          | 0            | 60 | 120 | 180 |
|          | Time(Months) |    |     |     |

### UCEC

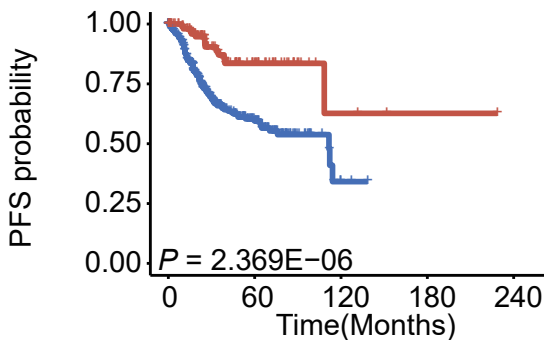

|          |              |    |     |     |     |
|----------|--------------|----|-----|-----|-----|
| Low TMB  | 411          | 71 | 2   | 0   | 0   |
| High TMB | 113          | 28 | 3   | 1   | 0   |
|          | 0            | 60 | 120 | 180 | 240 |
|          | Time(Months) |    |     |     |     |

Group of TMB

— Low — High

**(H)**

ACC

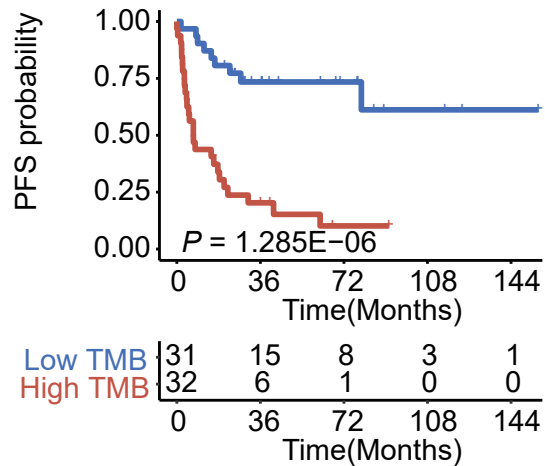

BLCA

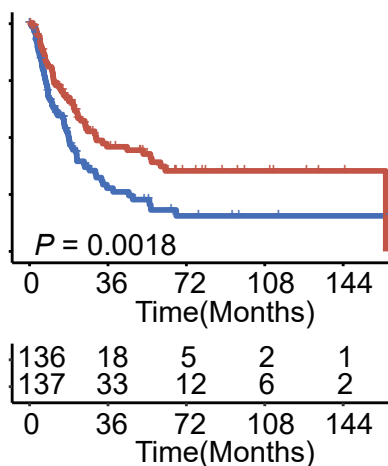

ESCA

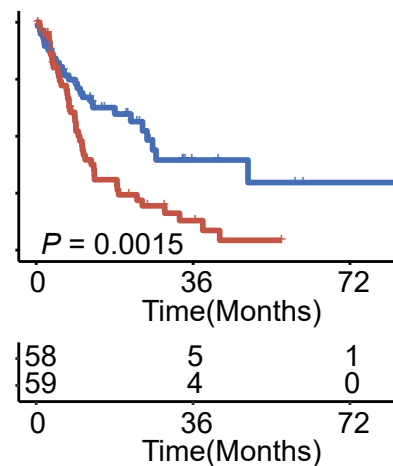

KIRC

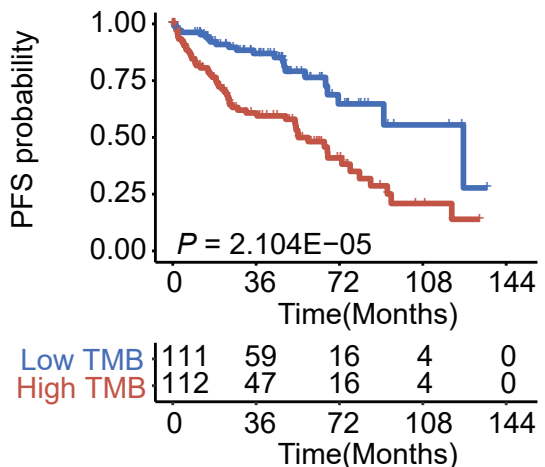

LGG

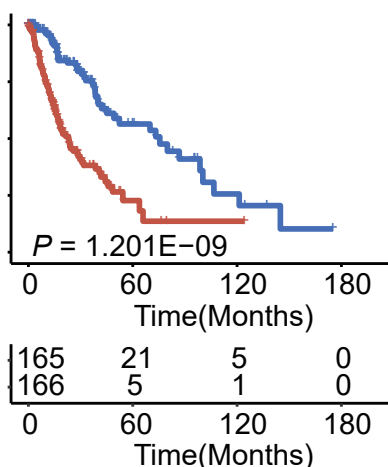

OV

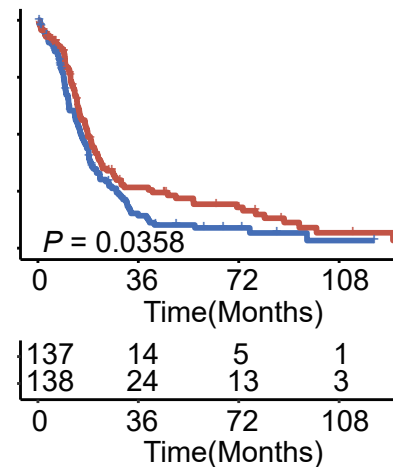

STAD

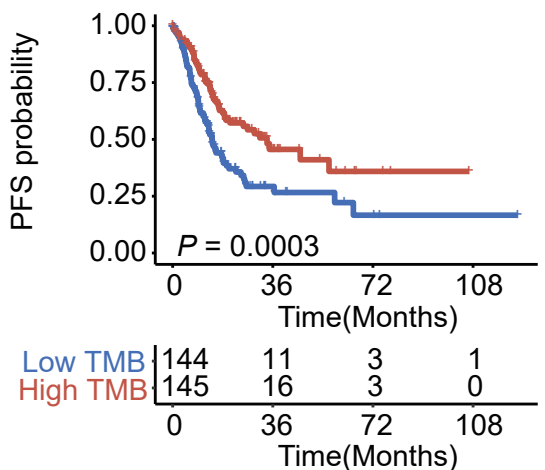

THCA

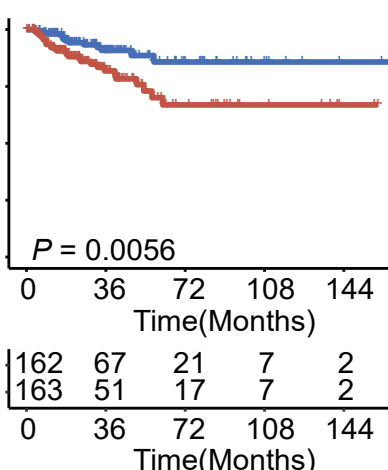

UCEC

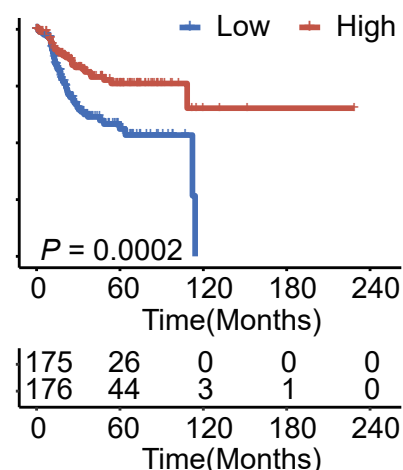

Supplement: mmc2.pdf [file mmc2.pdf]
