# Supplementary figures and images for: Multiomics analysis of tumor mutational burden across cancer types
Source: PubMed Central journal article supplement — Comput Struct Biotechnol J. 2021 Oct 12;19:5637–46. doi: 10.1016/j.csbj.2021.10.013 (PMC8531462; doi:10.1016/j.csbj.2021.10.013), 2021-10-12

**(A)**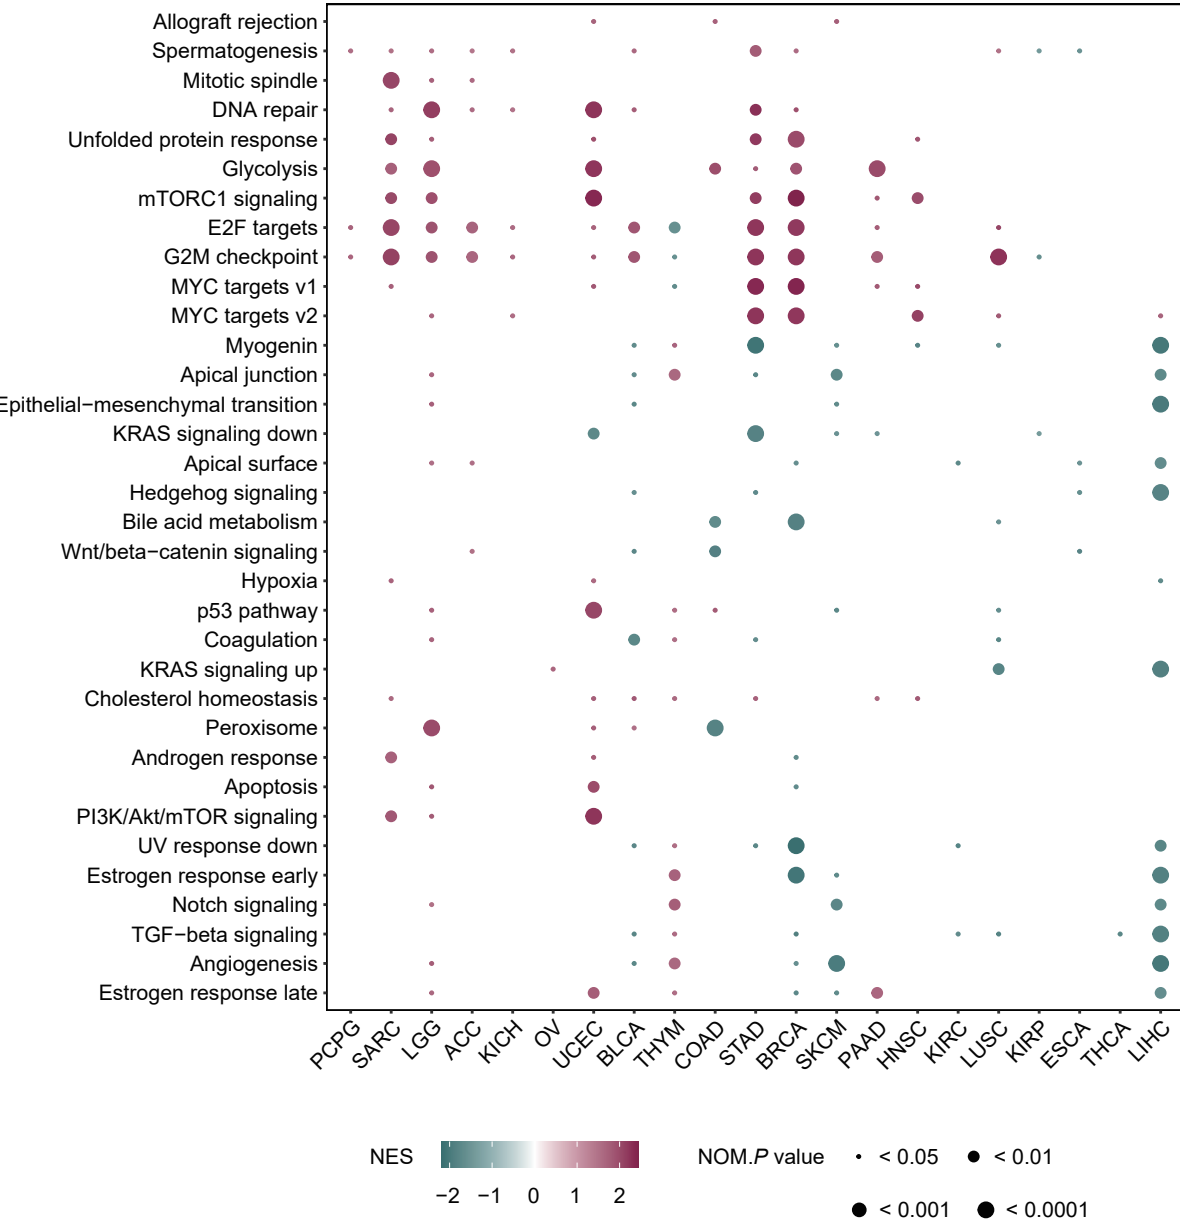**(B)**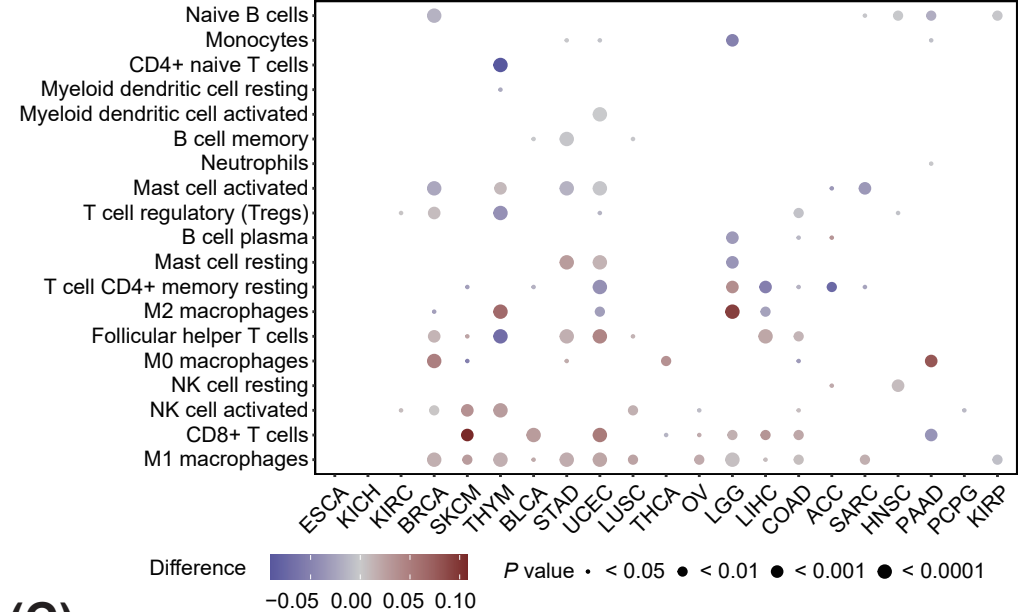**(C)**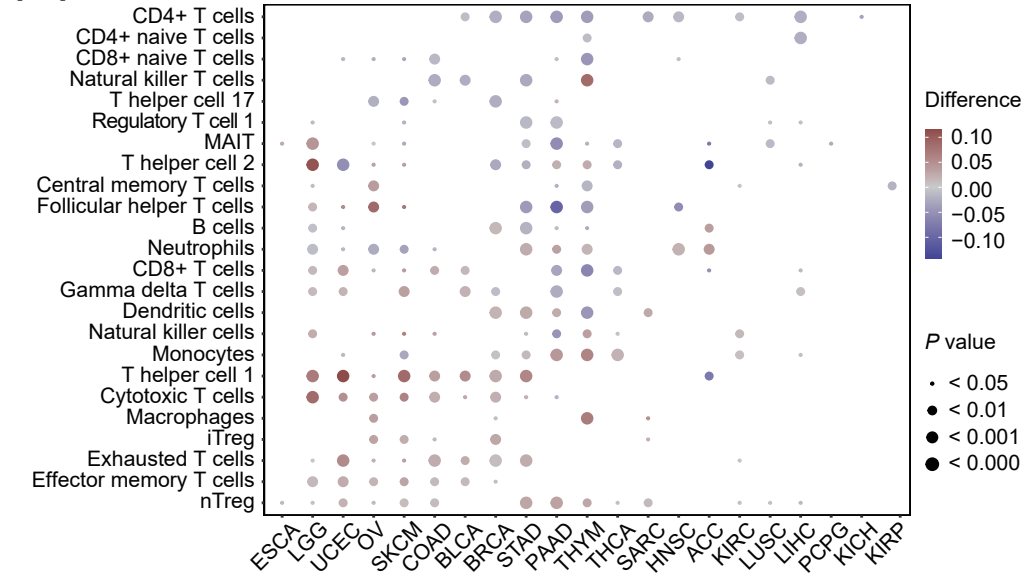

Supplement: mmc1.pdf [file mmc1.pdf]
